# Supplementary material
Source: PubMed Central journal article supplement (PMC2715489)
Supplement: 0812547106_0812547106SI.pdf [file 0812547106_0812547106SI.pdf]

# Supporting Information

Samuel et al. 10.1073/pnas.0812547106

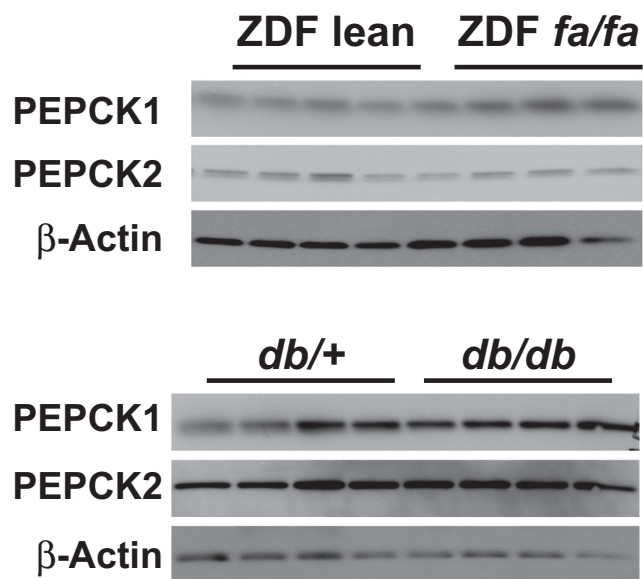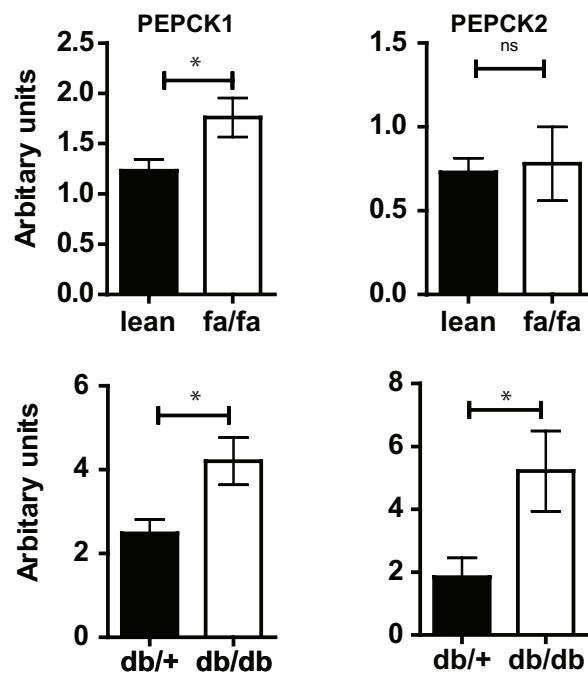

**Fig. S1.** Phosphoenolpyruvate carboxykinase 1 (PCK1) and PCK2 expression in Zucker Diabetic Fatty (ZDF) rats and *db/db* mice. (Left) Representative Western blots. (Right) Quantification of PCK1 and PCK2 expression, normalized to actin.  $n = 8$  per group.



**Table S1. Baseline data for ZDF rats and db/db mice and their relevant controls**

|                       | ZDF lean ( <i>n</i> = 8) | ZDF fa/fa ( <i>n</i> = 8) | <i>P</i> value | db/+ ( <i>n</i> = 8) | db/db ( <i>n</i> = 8) | <i>P</i> value |
|-----------------------|--------------------------|---------------------------|----------------|----------------------|-----------------------|----------------|
| Weight, g             | 304 ± 6.5                | 330 ± 11/8                | 0.08           | 25.5 ± 0.4           | 44.4 ± 0.7            | <0.0001        |
| Glucose, mg/dL        | 126 ± 4.3                | 189.4 ± 9                 | <0.0001        | 149 ± 4.3            | 341 ± 14              | <0.0001        |
| Insulin, μU/mL        | 10.5 ± 1.3               | 34.9 ± 13.2               | <0.0001        | 10.5 ± 1.3           | 34.9 ± 13.2           | <0.0001        |
| Glucagon, ng/mL       | 104.9 ± 11.3             | 64.5 ± 4.3                | 0.005          | 65.3 ± 7.6           | 82.50 ± 11.10         | 0.24           |
| Corticosterone, ng/mL | 243 ± 36                 | 545 ± 60                  | 0.0012         | 188.9 ± 20.1         | 429.3 ± 56.4          | 0.0013         |
| PEPCK1                | 1.0 ± 0.08               | 2.4 ± 0.29                | 0.0003         | 1.0 ± 0.17           | 5.7 ± 2.0             | 0.04           |
| PEPCK2                | 1.0 ± 0.22               | 3.2 ± 1.8                 | 0.21           | 1.0 ± 0.22           | 3.2 ± 1.8             | 0.21           |
